# Supplementary material
Source: publisher figshare collection journal article supplement (https://sage.figshare.com/ndownloader/files/21001425)
Supplement: Supplementary file 1 [file 21001425]

## **ONLINE APPENDIX**

### **Appendix A: Name-generator Questions**

#### **Network**

Please specify your individual contacts below by answering the following questions. The individuals you mention can be either from within or outside Neptune.

1. Over the last six months, from which work-related contacts did you regularly seek information and advice as input for your research and development work?
2. Suppose you were moving to a new job and wanted to leave behind the best network advice that you could for the person moving into the current job. Which individuals would you name whose knowledge and expertise is critical as a source of new ideas?
3. Which work-related contacts do you regard as a source of support for implementing your new ideas—that is, someone you are comfortable with discussing your new ideas?
4. Please list anyone who has been an important source of new knowledge and ideas to you over the last six months who you have not listed in the previous questions.

#### **Decision Makers and Opinion Leaders**

The following questions are about decision makers and opinion leaders in your work context.

Please specify the individuals within Neptune who have direct or indirect influence on important decisions that affect your work by answering the following questions.

1. Over the last six months, which people were involved in making important decisions regarding projects that you worked on?
2. Are there any individuals whose opinion was critical during review or evaluation of projects but who were not formally making the decision?

## Appendix B: Correlation Tables

**Table B1. Correlations for the Sample of Technologists (N = 187)\***

|                                        | 1     | 2     | 3     | 4     | 5     | 6     | 7     | 8     | 9     | 10    | 11    | 12    | 13    | 14    |
|----------------------------------------|-------|-------|-------|-------|-------|-------|-------|-------|-------|-------|-------|-------|-------|-------|
| 1. Innovation performance              |       |       |       |       |       |       |       |       |       |       |       |       |       |       |
| 2. Shared technical expertise          | .026  |       |       |       |       |       |       |       |       |       |       |       |       |       |
| 3. Ego prominence                      | .053  | .115  |       |       |       |       |       |       |       |       |       |       |       |       |
| 4. Ego speed to promotion              | .155  | .157  | .204  |       |       |       |       |       |       |       |       |       |       |       |
| 5. Ego seniority                       | -.188 | .085  | .575  | .072  |       |       |       |       |       |       |       |       |       |       |
| 6. Ego number of partners              | .121  | -.199 | .202  | .063  | .124  |       |       |       |       |       |       |       |       |       |
| 7. Ego research portfolio time horizon | -.137 | -.056 | .166  | .058  | .196  | -.007 |       |       |       |       |       |       |       |       |
| 8. Ego network degree                  | -.150 | -.097 | .221  | .091  | .156  | .110  | .066  |       |       |       |       |       |       |       |
| 9. Ego network closure                 | .019  | -.026 | -.018 | -.042 | -.032 | .053  | -.008 | -.232 |       |       |       |       |       |       |
| 10. Partner prominence                 | -.079 | .142  | .299  | .152  | .333  | -.058 | .167  | .023  | -.022 |       |       |       |       |       |
| 11. Partner speed to promotion         | .014  | .031  | -.093 | -.015 | -.078 | -.087 | -.075 | -.018 | -.170 | -.014 |       |       |       |       |
| 12. Partner support                    | .002  | .088  | .097  | .069  | .049  | .150  | -.199 | .027  | .082  | .097  | .012  |       |       |       |
| 13. Partner number of partners         | .179  | .149  | .003  | .280  | .007  | .031  | .097  | -.108 | -.043 | .254  | -.077 | .109  |       |       |
| 14. Overlapped networking              | .059  | .025  | .106  | .057  | .059  | .036  | -.049 | .117  | .085  | .010  | -.032 | -.064 | -.199 |       |
| 15. Dual networking                    | .111  | -.025 | -.100 | -.078 | -.189 | .001  | -.097 | .082  | -.048 | -.168 | .077  | .119  | -.043 | -.021 |

\* Correlations >|0.143| are significant at 5%.

**Table B2. Correlations for the Sample of Managers (N = 213)\***

|                                        | 1     | 2     | 3     | 4     | 5     | 6     | 7     | 8     | 9     | 10    | 11    | 12    | 13    | 14    |
|----------------------------------------|-------|-------|-------|-------|-------|-------|-------|-------|-------|-------|-------|-------|-------|-------|
| 1. Innovation performance              |       |       |       |       |       |       |       |       |       |       |       |       |       |       |
| 2. Shared technical expertise          | .020  |       |       |       |       |       |       |       |       |       |       |       |       |       |
| 3. Ego prominence                      | .191  | .179  |       |       |       |       |       |       |       |       |       |       |       |       |
| 4. Ego speed to promotion              | .198  | -.031 | .009  |       |       |       |       |       |       |       |       |       |       |       |
| 5. Ego seniority                       | .011  | .044  | .594  | -.057 |       |       |       |       |       |       |       |       |       |       |
| 6. Ego number of partners              | .182  | .131  | .082  | .012  | -.102 |       |       |       |       |       |       |       |       |       |
| 7. Ego research portfolio time horizon | -.089 | .066  | .050  | -.033 | -.008 | .237  |       |       |       |       |       |       |       |       |
| 8. Ego network degree                  | .105  | .138  | .088  | -.046 | .071  | .132  | .058  |       |       |       |       |       |       |       |
| 9. Ego network closure                 | -.025 | .097  | -.054 | -.026 | .010  | -.151 | -.133 | -.181 |       |       |       |       |       |       |
| 10. Partner prominence                 | .112  | .093  | .241  | .006  | .208  | -.039 | .099  | .015  | -.031 |       |       |       |       |       |
| 11. Partner speed to promotion         | .122  | .070  | .072  | .008  | .074  | .043  | .113  | .042  | -.075 | .153  |       |       |       |       |
| 12. Partner support                    | .194  | .022  | .186  | .007  | .094  | -.112 | -.046 | .025  | .015  | .124  | .024  |       |       |       |
| 13. Partner number of partners         | .042  | -.057 | .169  | .052  | .208  | -.106 | -.024 | -.071 | .041  | .310  | .075  | -.035 |       |       |
| 14. Overlapped networking              | -.026 | .016  | .011  | -.080 | .087  | -.045 | -.036 | -.106 | .170  | .020  | .087  | -.097 | .076  |       |
| 15. Dual networking                    | .090  | -.061 | -.051 | .069  | -.047 | .083  | .045  | .061  | .007  | -.110 | -.121 | .162  | -.081 | -.071 |

\* Correlations >|0.132| are significant at 5%.

## Appendix C: Patterns of Divided and Dual Networking between Managers and Technologists

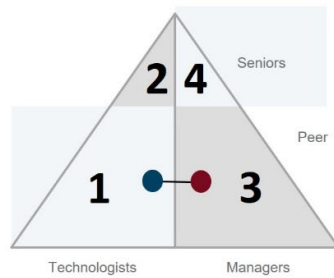

### Census – Patterns of divided versus dual networking between R&D managers and technologists

Rows Configuration of focal manager ego-network (dark red node)  
Columns Configuration of focal technologist ego-network (dark blue node)

Four digit codes indicate absence/presence (0/1) of ties to the four role sets shown in the diagram at the top left.

|                                                 |      | Technologist |                                                                                   |                                                                                   |                                                                                   |                                                                                   |                                                                                   |                                                                                   |                                                                                   |                                                                                   |                                                                                     |                                                                                     |                                                                                     |                                                                                     |                                                                                     |                                                                                     |                                                                                     |                                                                                     |
|-------------------------------------------------|------|--------------|-----------------------------------------------------------------------------------|-----------------------------------------------------------------------------------|-----------------------------------------------------------------------------------|-----------------------------------------------------------------------------------|-----------------------------------------------------------------------------------|-----------------------------------------------------------------------------------|-----------------------------------------------------------------------------------|-----------------------------------------------------------------------------------|-------------------------------------------------------------------------------------|-------------------------------------------------------------------------------------|-------------------------------------------------------------------------------------|-------------------------------------------------------------------------------------|-------------------------------------------------------------------------------------|-------------------------------------------------------------------------------------|-------------------------------------------------------------------------------------|-------------------------------------------------------------------------------------|
|                                                 |      | N            | 0000                                                                              | 0001                                                                              | 0010                                                                              | 0011                                                                              | 0100                                                                              | 0101                                                                              | 0110                                                                              | 0111                                                                              | 1000                                                                                | 1001                                                                                | 1010                                                                                | 1011                                                                                | 1100                                                                                | 1101                                                                                | 1110                                                                                | 1111                                                                                |
|                                                 |      |              |  |  |  |  |  |  |  |  |  |  |  |  |  |  |  |  |
| Manager - Only ties outside four core role sets | 0000 | 0            | 0                                                                                 | 0                                                                                 | 0                                                                                 | 0                                                                                 | 0                                                                                 | 0                                                                                 | 0                                                                                 | 0                                                                                 | 0                                                                                   | 0                                                                                   | 0                                                                                   | 0                                                                                   | 0                                                                                   | 0                                                                                   | 0                                                                                   | 0                                                                                   |
| Only ties to senior managers                    | 0001 | 1            | 0                                                                                 | 0                                                                                 | 0                                                                                 | 0                                                                                 | 0                                                                                 | 0                                                                                 | 0                                                                                 | 0                                                                                 | 0                                                                                   | 0                                                                                   | 0                                                                                   | 0                                                                                   | 0                                                                                   | 1                                                                                   | 0                                                                                   | 0                                                                                   |
| Only ties to peer managers                      | 0010 | 16           | 0                                                                                 | 0                                                                                 | 1                                                                                 | 1                                                                                 | 1                                                                                 | 0                                                                                 | 1                                                                                 | 2                                                                                 | 1                                                                                   | 0                                                                                   | 3                                                                                   | 0                                                                                   | 2                                                                                   | 0                                                                                   | 4                                                                                   | 0                                                                                   |
| Only ties to managers (peer + senior)           | 0011 | 11           | 0                                                                                 | 0                                                                                 | 0                                                                                 | 0                                                                                 | 1                                                                                 | 0                                                                                 | 1                                                                                 | 0                                                                                 | 0                                                                                   | 3                                                                                   | 1                                                                                   | 1                                                                                   | 0                                                                                   | 3                                                                                   | 1                                                                                   |                                                                                     |
| Only ties to senior technologists               | 0100 | 4            | 0                                                                                 | 0                                                                                 | 0                                                                                 | 0                                                                                 | 0                                                                                 | 0                                                                                 | 0                                                                                 | 1                                                                                 | 0                                                                                   | 0                                                                                   | 0                                                                                   | 0                                                                                   | 1                                                                                   | 0                                                                                   | 2                                                                                   | 0                                                                                   |
| Only ties to seniors (managers + techn.)        | 0101 | 4            | 0                                                                                 | 0                                                                                 | 0                                                                                 | 0                                                                                 | 0                                                                                 | 0                                                                                 | 0                                                                                 | 0                                                                                 | 0                                                                                   | 0                                                                                   | 0                                                                                   | 0                                                                                   | 1                                                                                   | 1                                                                                   | 0                                                                                   | 2                                                                                   |
| Only ties to senior techn. + peer managers      | 0110 | 16           | 1                                                                                 | 0                                                                                 | 0                                                                                 | 2                                                                                 | 1                                                                                 | 1                                                                                 | 2                                                                                 | 3                                                                                 | 0                                                                                   | 0                                                                                   | 1                                                                                   | 0                                                                                   | 3                                                                                   | 0                                                                                   | 2                                                                                   | 0                                                                                   |
| Ties to all except peer technologists           | 0111 | 14           | 0                                                                                 | 0                                                                                 | 0                                                                                 | 1                                                                                 | 1                                                                                 | 0                                                                                 | 0                                                                                 | 4                                                                                 | 1                                                                                   | 0                                                                                   | 1                                                                                   | 1                                                                                   | 0                                                                                   | 0                                                                                   | 4                                                                                   | 1                                                                                   |
| Only ties to peer technologists                 | 1000 | 6            | 0                                                                                 | 1                                                                                 | 0                                                                                 | 0                                                                                 | 0                                                                                 | 0                                                                                 | 0                                                                                 | 0                                                                                 | 1                                                                                   | 0                                                                                   | 1                                                                                   | 0                                                                                   | 0                                                                                   | 1                                                                                   | 2                                                                                   | 0                                                                                   |
| Only ties to peer + senior technologists        | 1001 | 0            | 0                                                                                 | 0                                                                                 | 0                                                                                 | 0                                                                                 | 0                                                                                 | 0                                                                                 | 0                                                                                 | 0                                                                                 | 0                                                                                   | 0                                                                                   | 0                                                                                   | 0                                                                                   | 0                                                                                   | 0                                                                                   | 0                                                                                   | 0                                                                                   |
| Only ties to peers (managers + technologists)   | 1010 | 41           | 0                                                                                 | 0                                                                                 | 0                                                                                 | 0                                                                                 | 2                                                                                 | 1                                                                                 | 4                                                                                 | 4                                                                                 | 5                                                                                   | 0                                                                                   | 7                                                                                   | 3                                                                                   | 3                                                                                   | 0                                                                                   | 12                                                                                  | 0                                                                                   |
| Ties to all except senior technologists         | 1011 | 13           | 0                                                                                 | 0                                                                                 | 1                                                                                 | 1                                                                                 | 2                                                                                 | 0                                                                                 | 1                                                                                 | 0                                                                                 | 0                                                                                   | 0                                                                                   | 1                                                                                   | 0                                                                                   | 1                                                                                   | 0                                                                                   | 4                                                                                   | 2                                                                                   |
| Only ties to technologists                      | 1100 | 15           | 0                                                                                 | 0                                                                                 | 0                                                                                 | 0                                                                                 | 1                                                                                 | 0                                                                                 | 2                                                                                 | 1                                                                                 | 0                                                                                   | 0                                                                                   | 2                                                                                   | 1                                                                                   | 0                                                                                   | 2                                                                                   | 3                                                                                   | 3                                                                                   |
| Ties to all except peer managers                | 1101 | 3            | 0                                                                                 | 0                                                                                 | 0                                                                                 | 0                                                                                 | 0                                                                                 | 0                                                                                 | 1                                                                                 | 1                                                                                 | 0                                                                                   | 0                                                                                   | 0                                                                                   | 0                                                                                   | 1                                                                                   | 0                                                                                   | 0                                                                                   | 0                                                                                   |
| Ties to all except senior managers              | 1110 | 52           | 0                                                                                 | 1                                                                                 | 0                                                                                 | 0                                                                                 | 3                                                                                 | 5                                                                                 | 4                                                                                 | 2                                                                                 | 4                                                                                   | 0                                                                                   | 7                                                                                   | 0                                                                                   | 6                                                                                   | 1                                                                                   | 13                                                                                  | 6                                                                                   |
| Ties to all role sets                           | 1111 | 17           | 0                                                                                 | 0                                                                                 | 1                                                                                 | 0                                                                                 | 0                                                                                 | 0                                                                                 | 0                                                                                 | 3                                                                                 | 1                                                                                   | 0                                                                                   | 2                                                                                   | 0                                                                                   | 1                                                                                   | 1                                                                                   | 7                                                                                   | 1                                                                                   |
| N                                               |      | 213          | 1                                                                                 | 2                                                                                 | 3                                                                                 | 5                                                                                 | 12                                                                                | 7                                                                                 | 16                                                                                | 21                                                                                | 13                                                                                  | 0                                                                                   | 28                                                                                  | 6                                                                                   | 21                                                                                  | 6                                                                                   | 56                                                                                  | 16                                                                                  |

|                   | N  | Extent of divided versus dual networking                                                                                          | Graphical representation<br>Grey nodes indicate any role set |
|-------------------|----|-----------------------------------------------------------------------------------------------------------------------------------|--------------------------------------------------------------|
| downward diagonal | 29 | Complete dual networking / No divided networking                                                                                  |                                                              |
| below diagonal    | 34 | Mostly dual networking - Manager connects to one additional role set                                                              |                                                              |
| above diagonal    | 41 | Mostly dual networking - Technologist connects to one additional role set                                                         |                                                              |
|                   | 13 | Dual networking with two role sets; divided networking with two other role sets                                                   |                                                              |
|                   | 28 | Dual networking with one role set; two sets divided; no connections to final set                                                  |                                                              |
| below diagonal    | 14 | Mostly divided networking – Manager connects to two or more additional sets                                                       |                                                              |
| above diagonal    | 19 | Mostly divided networking - Technologist connects to two additional role sets                                                     |                                                              |
| below diagonal    | 13 | Mostly divided networking – Dual networking with one role set; two role sets connected by the manager and one by the technologist |                                                              |
| above diagonal    | 5  | Mostly divided networking – Dual networking with one role set; two role sets connected by the technologist and one by the manager |                                                              |
| upward diagonal   | 6  | Complete divided networking                                                                                                       |                                                              |
|                   | 11 | Multiple role sets not covered by either party                                                                                    |                                                              |

## **Appendix D: Additional Analyses: Dual versus Overlapped Networking**

The central tenet of this paper is that collaborating managers and technologists who engage in dual networking (i.e., connect to the same role sets but different individuals) attain an innovation performance advantage over those who engage in divided networking (i.e., connect to distinct role sets). We argue that this advantage is rooted in the possibility of collaborators engaging in dual networking to benefit from dual interpretation and dual influencing. To some extent, however, overlapped networking—connecting to the same individuals—also allows for dual interpretation and dual influencing, albeit in different and more limited ways than dual networking. Although we do control for overlapped networking in all our analyses and establish that dual networking has a greater advantage for individual managers' and technologists' innovation performance compared with overlapped networking, space constraints in the paper do not allow us to engage with this issue more fully.

First, we gauge the extent to which overlapped networking may allow for dual interpretation. We argue that the information diversity that managers and technologists get from overlapping connections is much reduced compared with that obtained from different individuals from the same role sets through dual networking. Although having overlapping input from shared alters may help in the joint sensemaking process, it is conceivable that high levels of overlapped networking carry a risk of myopia and cognitive lock-in (Levinthal and March, 1993). This risk may be particularly salient for manager–technologist pairs who have spent much time in the same division and thus likely already have more overlapping expertise and similar outlooks (March, 1991; Fang, Lee, and Schilling, 2010). To test for this possibility, we performed an additional analysis in which we interacted overlapped networking with the sum of manager–technologist tenure in the division. Model 1b in table D1 demonstrates that the positive effect of overlapped networking is indeed reduced for managers when the combined tenure of the pair is high. We do not find an equivalent effect

**Table D1. Post-hoc Analyses Probing the Effect of Overlapped Networking\***

| Variables                                              | Technologists                  |                               | Managers                       |                               |
|--------------------------------------------------------|--------------------------------|-------------------------------|--------------------------------|-------------------------------|
|                                                        | Model 1a                       | Model 2a                      | Model 1b                       | Model 2b                      |
| Shared technical expertise                             | -.337 <sup>+</sup><br>(.191)   | -.216<br>(.242)               | -.301 <sup>**</sup><br>(.079)  | -.162 <sup>+</sup><br>(.095)  |
| Ego prominence                                         | .173 <sup>+</sup><br>(.103)    | .190 <sup>+</sup><br>(.105)   | .214<br>(.200)                 | .211<br>(.191)                |
| Ego speed to promotion                                 | .397 <sup>**</sup><br>(.143)   | .368 <sup>+</sup><br>(.193)   | .491 <sup>**</sup><br>(.058)   | .540 <sup>**</sup><br>(.043)  |
| Ego seniority                                          | -.859 <sup>*</sup><br>(.401)   | -.957 <sup>*</sup><br>(.408)  | -.464 <sup>+</sup><br>(.267)   | -.419<br>(.258)               |
| Ego number of partners                                 | .431 <sup>**</sup><br>(.126)   | .455 <sup>**</sup><br>(.133)  | .412 <sup>+</sup><br>(.219)    | .408 <sup>+</sup><br>(.230)   |
| Ego research portfolio time horizon                    | -.308<br>(.209)                | -.382<br>(.250)               | -.603 <sup>**</sup><br>(.171)  | -.589 <sup>**</sup><br>(.221) |
| Ego network degree                                     | -.114 <sup>**</sup><br>(.0165) | -.107 <sup>**</sup><br>(.026) | .085 <sup>*</sup><br>(.037)    | .081 <sup>**</sup><br>(.021)  |
| Ego network closure                                    | .0518<br>(.349)                | -.006<br>(.343)               | .172<br>(.605)                 | .009<br>(.387)                |
| Partner prominence                                     | -.117 <sup>**</sup><br>(.0129) | -.116 <sup>**</sup><br>(.010) | .045 <sup>*</sup><br>(.019)    | .058 <sup>**</sup><br>(.003)  |
| Partner speed to promotion                             | .0901<br>(.0793)               | .130 <sup>**</sup><br>(.049)  | .242 <sup>**</sup><br>(.067)   | .290 <sup>**</sup><br>(.051)  |
| Partner support                                        | -.0537 <sup>+</sup><br>(.0299) | -.063 <sup>**</sup><br>(.023) | .277 <sup>**</sup><br>(.005)   | .309 <sup>**</sup><br>(.003)  |
| Partner number of partners                             | .224 <sup>**</sup><br>(.0216)  | .234 <sup>**</sup><br>(.034)  | .012<br>(.043)                 | .004<br>(.048)                |
| Overlapped networking                                  | -.523<br>(3.143)               | -.424<br>(.405)               | 7.829 <sup>**</sup><br>(.419)  | -.774<br>(.665)               |
| Dual networking                                        | .534 <sup>**</sup><br>(.101)   | .443 <sup>**</sup><br>(.057)  | .433 <sup>**</sup><br>(.074)   | .530 <sup>**</sup><br>(.129)  |
| Dyad tenure in division (log)                          | .170 <sup>**</sup><br>(.00234) |                               | .517<br>(.450)                 |                               |
| Overlapped networking * Dyad tenure in division (log)  | .445<br>(1.275)                |                               | -3.125 <sup>**</sup><br>(.046) |                               |
| Number of same decision makers                         |                                | -.102 <sup>**</sup><br>(.005) |                                | .213 <sup>**</sup><br>(.076)  |
| Overlapped networking * Number of same decision makers |                                | .990 <sup>**</sup><br>(.304)  |                                | .353<br>(1.059)               |
| Cut1                                                   | 1.052 <sup>**</sup><br>(.219)  | .481 <sup>*</sup><br>(.210)   | 4.424 <sup>**</sup><br>(1.677) | 3.504 <sup>**</sup><br>(.344) |
| Cut2                                                   | 1.804 <sup>**</sup><br>(.131)  | 1.235 <sup>**</sup><br>(.116) | 5.285 <sup>**</sup><br>(1.706) | 4.363 <sup>**</sup><br>(.365) |
| McKelvey & Zavoina R <sup>2</sup>                      | .306                           | .309                          | .282                           | .290                          |
| Log-likelihood                                         | -161.8                         | -161.9                        | -205.6                         | -205.4                        |
| Observations                                           | 187                            | 187                           | 213                            | 213                           |

<sup>+</sup>  $p < .10$ ; <sup>\*</sup>  $p < .05$ ; <sup>\*\*</sup>  $p < .01$ .

\* Standard errors in parenthesis are clustered by ego seniority. Dummies for six business units are included.

for technologists (model 1a). This may be because managers are expected to act as generalists who can challenge specialist technologists by offering a broader perspective on their work. It may be this generalist role of the manager within the partnership that is jeopardized if the pair have spent a long time in the same division and have many overlapping ties.

Second, overlapped networking may also allow for dual influencing, albeit with the difference that managers and technologists target their influencing attempts at the same individuals rather than merely at the same role sets. Although such targeted individuals may be more easily convinced if both the manager and technologist approach them, high levels of overlapping ties occur at the expense of building a narrower base of support (see the lower graph in figure 1 in the paper). As such, from an influencing perspective, overlapped networking could be more effective in environments with a concentrated power base than in environments where power is spread. In line with this argument, model 2a in table D1 shows that technologists who indicate the same individuals that their manager does as relevant decision makers and opinion leaders benefit more from overlapped networking than those who see different individuals as influential. However, there is no equivalent effect for managers (model 2b). This is consistent with our earlier observation that overlapped networking is often targeted at prominent individuals, particularly senior technologists. Technologists may be more dependent than managers on the scientific legitimacy bestowed on them from senior technologists.

## REFERENCES

- Fang, C., J. Lee, and M. A. Schilling  
2010 “Balancing exploration and exploitation through structural design: The isolation of subgroups and organizational learning.” *Organization Science*, 21: 625–642.
- Levinthal, D. A., and J. G. March  
1993 “The myopia of learning.” *Strategic Management Journal*, 14: 95–112.
- March, J. G.  
1991 “Exploration and exploitation in organizational learning.” *Organization Science*, 2: 71–87.
